# Supplementary material for: Role of Inflammation and Redox Status on Doxorubicin-Induced Cardiotoxicity in Infant and Adult CD-1 Male Mice
Source: MDPI journal article supplement (doi:10.3390/biom11111725), 2021-11-19
Supplement: s1 [file s1]

## Supplementary Materials

### Article

# Role of inflammation and redox status on doxorubicin-induced cardiotoxicity in infant and adult CD-1 male mice

Ana Reis-Mendes<sup>1,2,\*</sup>, Ana Isabel Padrão<sup>3</sup>, José Alberto Duarte<sup>3,4</sup>, Salomé Gonçalves-Monteiro<sup>5</sup>, Margarida Duarte-Araújo<sup>6</sup>, Fernando Remião<sup>1,2</sup>, Félix Carvalho<sup>1,2</sup>, Emília Sousa<sup>7,8</sup>, Maria Lourdes Bastos<sup>1,2</sup> and Vera Marisa Costa<sup>1,2,\*</sup>

- <sup>1</sup> Associate Laboratory i4HB - Institute for Health and Bioeconomy, Laboratory of Toxicology, Department of Biological Sciences, Faculty of Pharmacy, University of Porto, 4050-313 Porto, Portugal; afreis.mendes@gmail.com (A.R.-M.); remiao@ff.up.pt (F.R.); felixdc@ff.up.pt (F.C.); mlbastos@ff.up.pt (M.L.B.); veramcosta@ff.up.pt (V.M.C.)
- <sup>2</sup> UCIBIO - Applied Molecular Biosciences Unit, REQUIMTE, Laboratory of Toxicology, Department of Biological Sciences, Faculty of Pharmacy, University of Porto, 4050-313 Porto, Portugal
- <sup>3</sup> Research Center in Physical Activity, Health and Leisure (CIAFEL), Laboratory for Integrative and Translational Research in Population Health (ITR), Faculty of Sport, University of Porto, 4200-450 Porto, Portugal; apadrao@fade.up.pt (A.I.P.); jarduarte@fade.up.pt (J.A.D.)
- <sup>4</sup> TOXRUN – Toxicology Research Unit, University Institute of Health Sciences, Advanced Polytechnic and University Cooperative (CESPU), CRL, 4585-116 Gandra, Portugal
- <sup>5</sup> Outcomes Research Lab, MOREHealth, Outcomes Research Lab, Portuguese Institute of Oncology at Porto Francisco Gentil (IPO Porto), 4200-072 Porto, Portugal; salomemonteiro8180@gmail.com (S.G.-M.)
- <sup>6</sup> Department of Immuno-Physiology and Pharmacology, ICBAS - Institute of Biomedical Sciences Abel Salazar, University of Porto, 4050-313 Porto, Portugal; mdcma@icbas.up.pt (M.D.-A.)
- <sup>7</sup> Laboratory of Organic and Pharmaceutical Chemistry, Chemistry Department, Faculty of Pharmacy, University of Porto, 4050-313 Porto, Portugal; esousa@ff.up.pt (E.S.)
- <sup>8</sup> CIIMAR – Interdisciplinary Centre of Marine and Environmental Research, 4450-208 Porto, Portugal.
- \* Correspondence: afreis.mendes@gmail.com (A.R.-M.); veramcosta@ff.up.pt (V.M.C.); Tel.: +351-220-428-599 (V.M.C.)

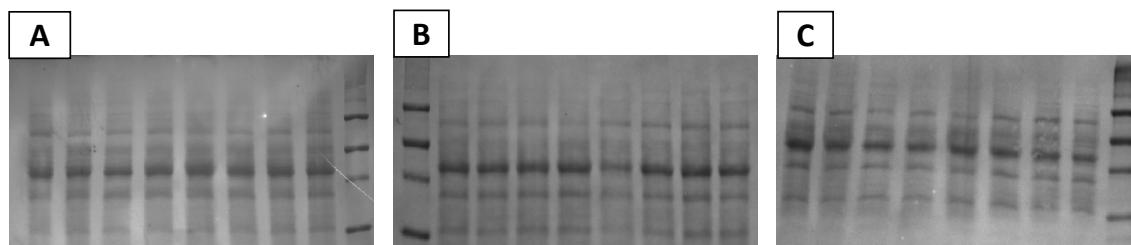

**Figure S1.** Loading control of Ponceau S staining of (A, B, C) nuclear factor erythroid-2 related factor 2 (Nrf2) (97 kDa) from infant and adult mice exposed to a cumulative dose of 18.0 mg/kg DOX or control animals.

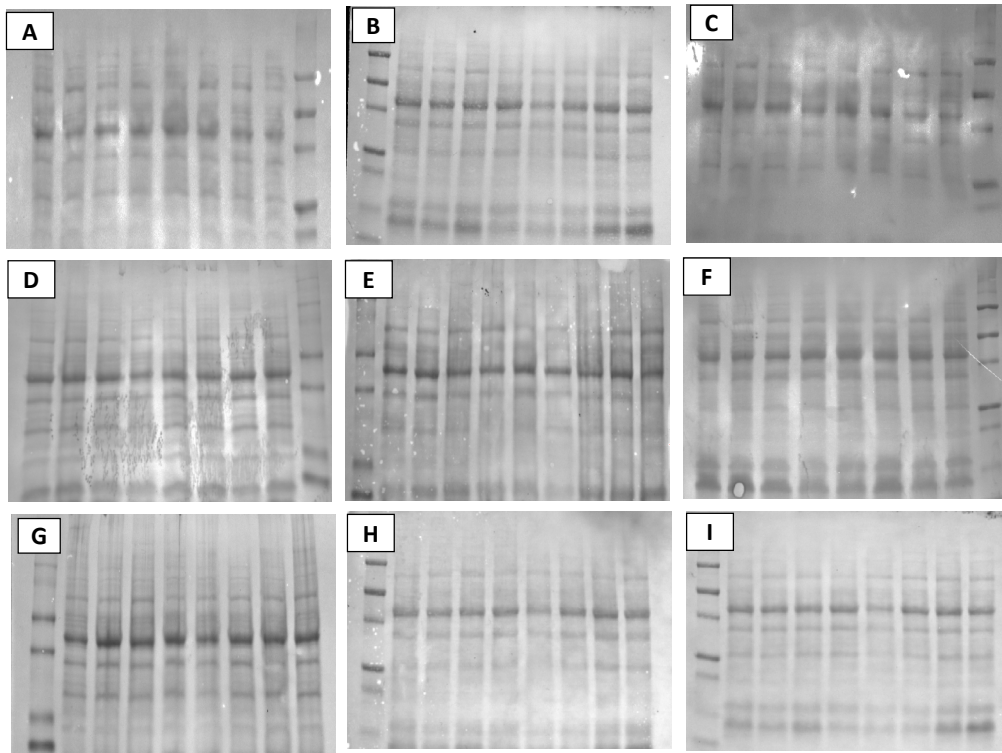

**Figure S2.** Loading control of Ponceau S staining of (A, B, C) p38 mitogen-activated protein kinase (p38 MAPK) (40 kDa), (D, E, F) nuclear factor kappa B (NF-κB) p65 (60 kDa) and NF-κB p52 (50 kDa), (G, H, I) myeloperoxidase (MPO) (48 kDa) from infant and adult mice exposed to a cumulative dose of 18.0 mg/kg DOX or control animals.

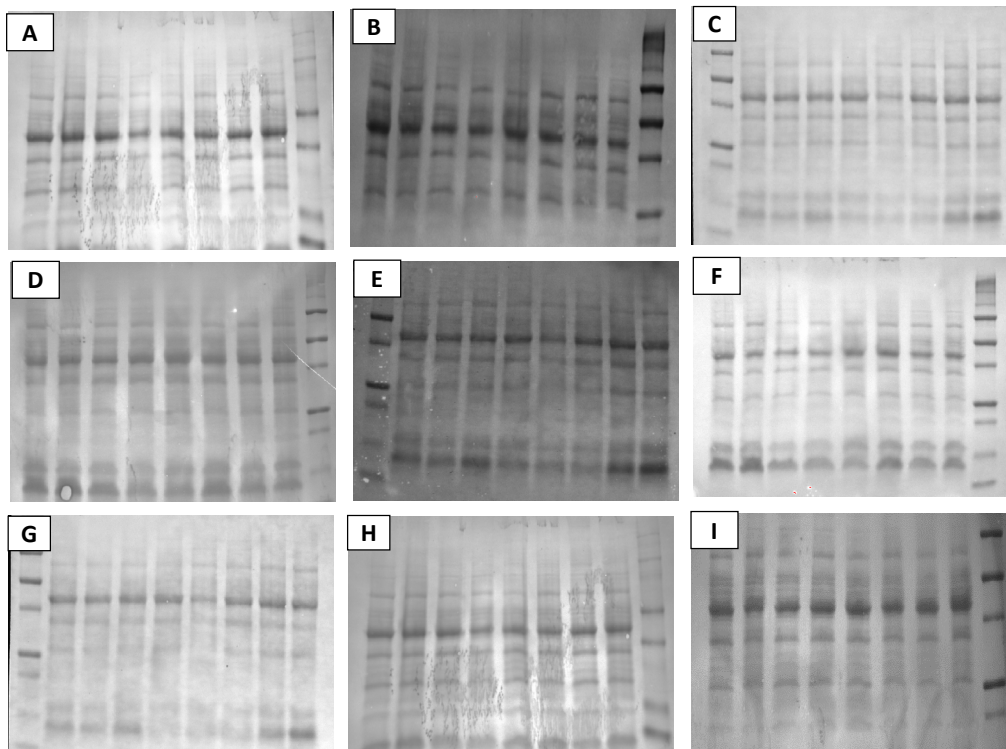

**Figure S3.** Loading control of Ponceau S staining of (A, B, C) Interleukin (IL)-1 beta (35 kDa), (D, E, F) IL-6 (24 kDa), (F, G) tumour necrosis factor-α (TNF-α) (25 kDa), (H, I) type 2 tumor necrosis factor receptor (TNFR2) (75 kDa) from infant and adult mice exposed to a cumulative dose of 18.0 mg/kg DOX or control animals.
